# Supplementary material
Source: Springer Nature journal article supplement (https://www.springermedizin.de/resource/supplementary/12967_2007_183_MOESM4_ESM.pdf/9575876)

A

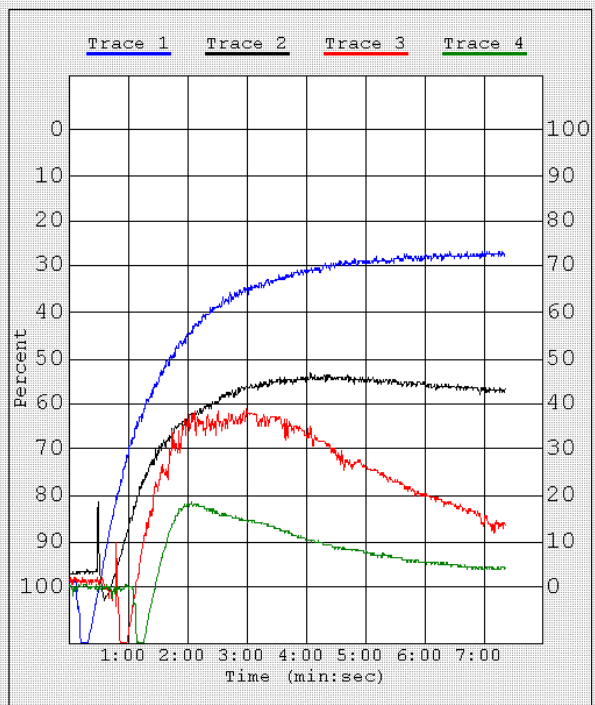

B

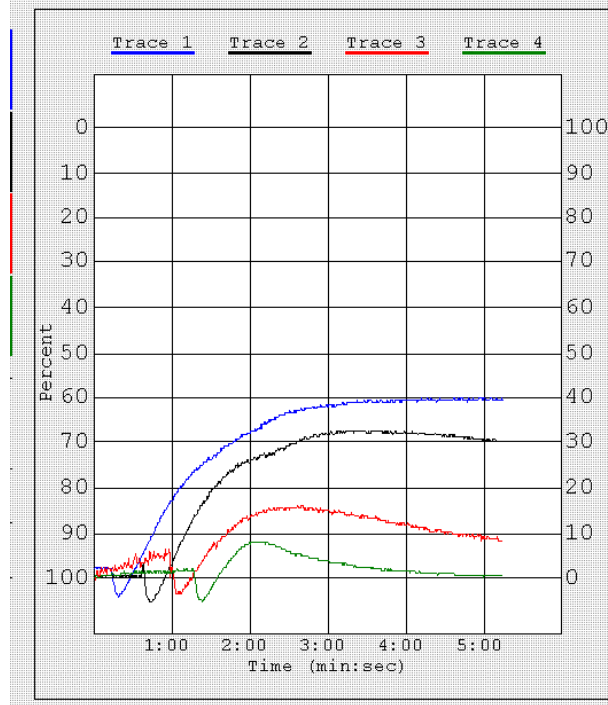

Supplement: MOESM4 [file 9575876]
